# Supplementary material for: Pleiotropic roles of the matricellular protein Sparc in tendon maturation and ageing
Source: PubMed Central journal article supplement (PMC5009305; doi:10.1038/srep32635), 2016-09-02
Supplement: srep32635-s1.pdf [file srep32635-s1.pdf]

1 **Pleiotropic roles of the matricellular protein Sparc in tendon maturation and ageing.**

2

3 Renate Gehwolf <sup>1,2</sup>, Andrea Wagner <sup>1,2</sup>, Christine Lehner <sup>1,2</sup>, Amy D. Bradshaw <sup>3</sup>, Cornelia  
4 Scharler <sup>4</sup>, Justyna A. Niestrawska <sup>5</sup>, Gerhard A. Holzapfel <sup>5</sup>, Hans-Christian Bauer <sup>1,2</sup>,  
5 Herbert Tempfer <sup>1,2</sup>, Andreas Traweger <sup>\* 1,2</sup>

6

7

8 **FIGURE LEGENDS: Supplementary figures**

9

10 **Figure S1. Differential gene expression in mouse Achilles tendon tissue**

11 **(a)** Quantitative RT-PCR results demonstrating repression of Matrix metalloproteinases 2 and 9 and  
12 the tendon cell associated marker Mohawk in healthy-aged mouse Achilles tendons. A change in  
13 expression  $\geq 2.0$  was assumed as a significant change (n=5 Achilles tendon samples); graphs represent  
14 means $\pm$ SEM. **(b)** Repression of the above-mentioned genes is also seen in tendon progenitor/stem  
15 cells of healthy-aged mouse Achilles tendons *in vitro* (passage nr. 3). qPCR data for healthy-aged  
16 tendons were normalized to young tendons, a fold change  $\geq 2.0$  was assumed as a significant difference  
17 in expression; shown are means $\pm$ SEM.

18

19 **Figure S2. Collagen type I to type II mRNA ratio**

20 Comparison of collagen type I to type III mRNA ratios for young, Sparc<sup>-/-</sup>, and healthy-aged Achilles  
21 tendons. Data represent means $\pm$ SEM of 3 independent biological replicates; \*\*\*P < 0.001, One-way  
22 ANOVA (Tukey's Multiple Comparison Test).

23

24 **Figure S5. Cell area and cell migration**

25 **(a)** Cell area of Sparc<sup>-/-</sup> TDSPCs on fibronectin coated surfaces is significantly reduced compared to  
26 young and healthy-aged wild type cells. No significant differences between young and healthy-aged  
27 tendon cells are seen. Cell area of a minimum of 160 cells was measured, \*\*\*P < 0.001, \*\*P<0.01, n.s.  
28 = not significant, (Kruskall-Wallis test with Dunn's Multiple Comparison test). **(b, c)** Wound healing  
29 assays on collagen type I and fibronectin coated surfaces reveal moderate changes in cell migration

30 speed *in vitro* for Sparc<sup>-/-</sup> and healthy-aged cells migrate moderately faster *in vitro*. Dot blots show  
31 results from 3 independent experiments and red bar indicates mean. Representative images for scratch-  
32 wound assays 0h and 10h after creating the wound are shown. \*\*\*P < 0.001, \*\*P < 0.01, One-way  
33 ANOVA (Tukey's Multiple Comparison Test).

34

1

2 **Supplementary Figures**

3

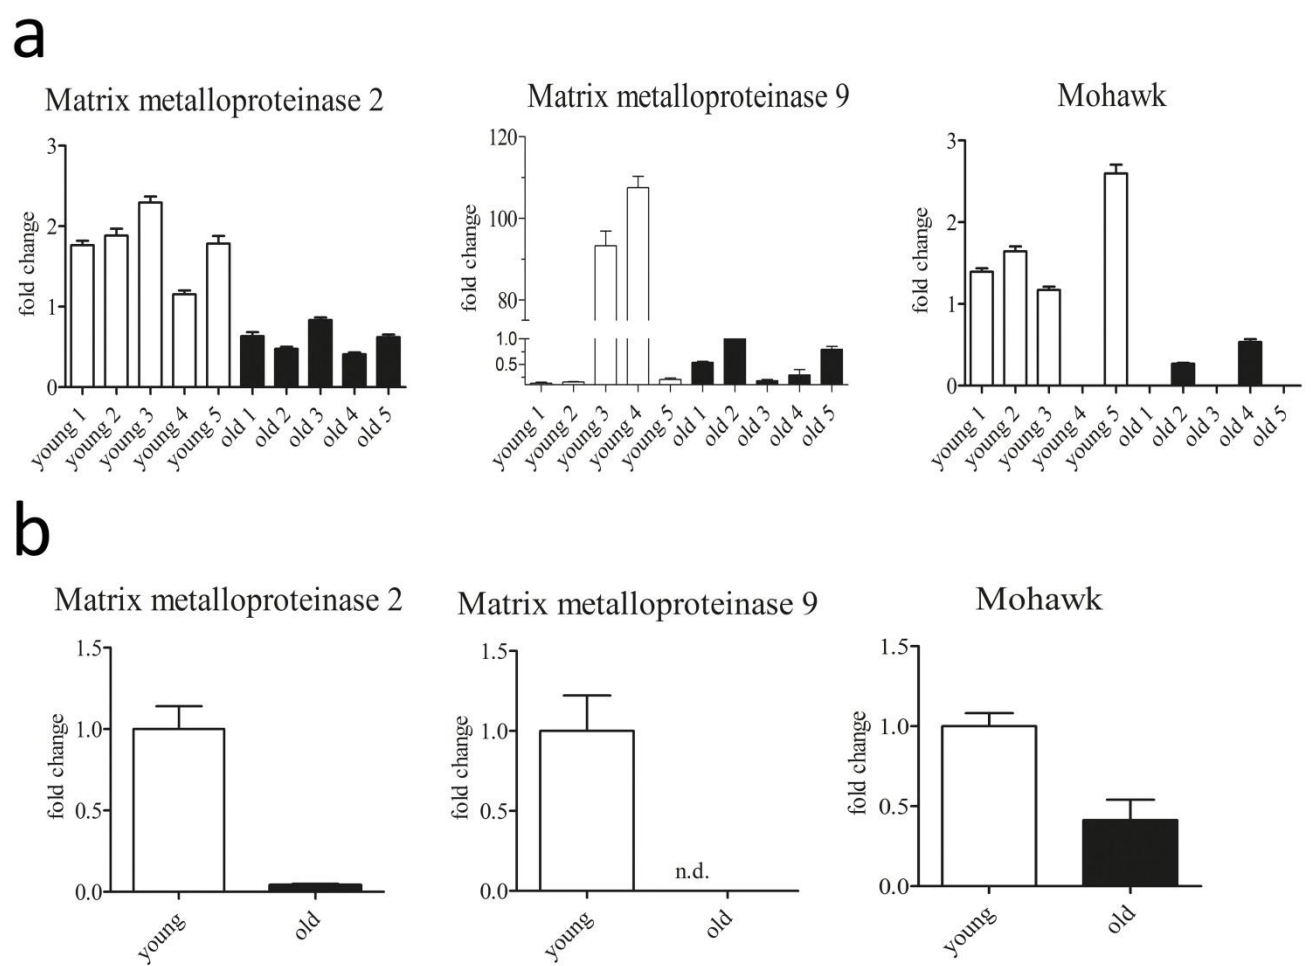

4

5

6 **Suppl Figure 1**

7

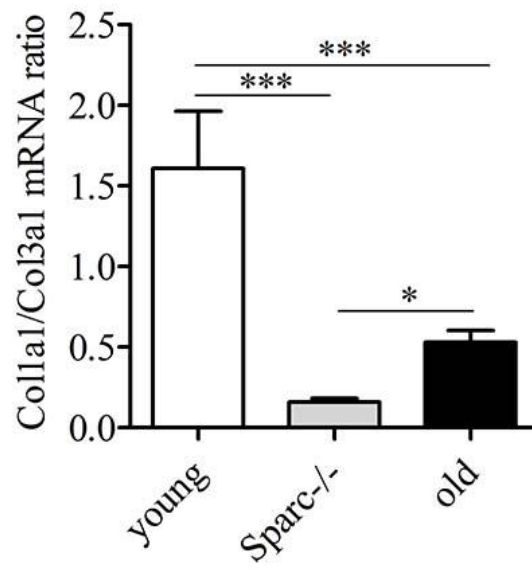

8

9 **Suppl Figure 2**

10

11

**a**

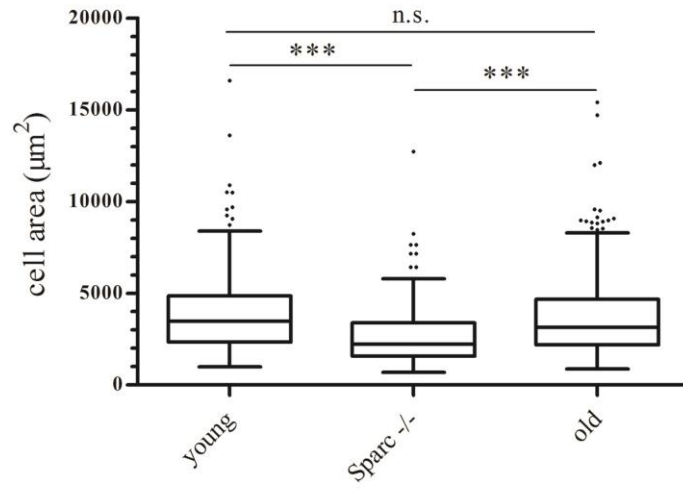

**b**

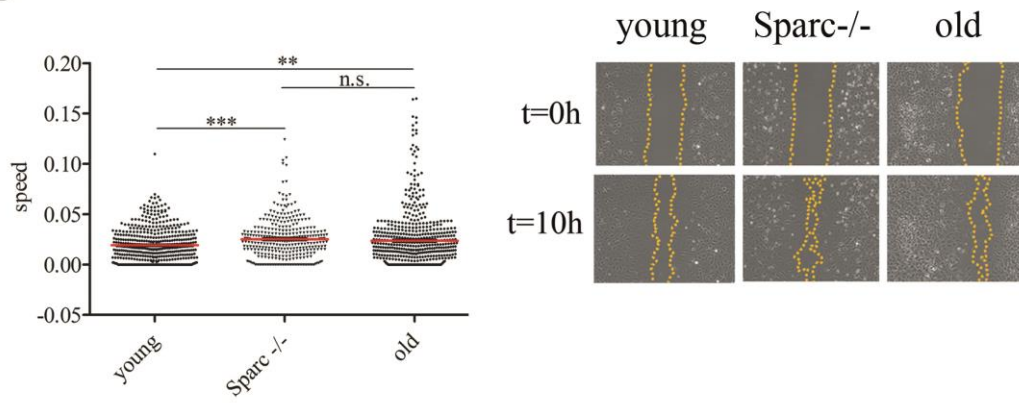

**c**

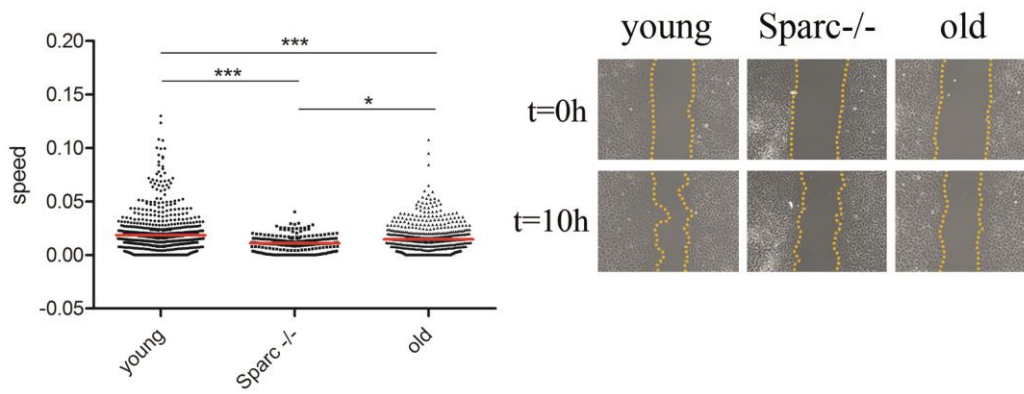

12

13

14 **Suppl Figure 5**
